# Supplementary material
Source: publisher figshare collection journal article supplement (https://acs.figshare.com/ndownloader/files/3811978)
Supplement: Supplementary file 1 [file 3811978]

# Supporting Information

## Molecular Mechanism of Avibactam Mediated $\beta$ -Lactamase Inhibition

Dustin T. King<sup>‡,1</sup>, Andrew M. King<sup>‡,2</sup>, Sarah M. Lal<sup>2</sup>, Gerard D. Wright<sup>‡,2</sup>, Natalie C.J. Strynadka<sup>\*,1</sup>

<sup>‡</sup>These authors contributed equally

<sup>1</sup>The Department of Biochemistry and Molecular Biology and Center for Blood Research, University of British Columbia. 2350 Health Sciences Mall, Vancouver, British Columbia, V6T 1Z3, Canada

<sup>2</sup>M.G. Department of Biochemistry and Biomedical Sciences and the Department of Chemistry, DeGroote Institute for Infectious Disease Research, McMaster University, Hamilton, Ontario, L8S 4K1, Canada

### TABLE OF CONTENTS

|                                                                                                      |         |
|------------------------------------------------------------------------------------------------------|---------|
| Methods.....                                                                                         | S2      |
| Dynamic light scattering.....                                                                        | S2      |
| LC-MS analysis of avibactam-CTX-M-15 mutants.....                                                    | S2      |
| Protein expression and purification for crystallographic studies.....                                | S2      |
| Tables.....                                                                                          | S3      |
| Table S1. Data collection and refinement statistics.....                                             | S3      |
| Table S2. Primers used in this study. Underline shows restriction sites.....                         | S4      |
| Table S3. Kinetic values for the hydrolysis of nitrocefin by CTX-M-15 mutants.....                   | S5      |
| Figures.....                                                                                         | S6      |
| Figure S1. Carbamyl-avibactam bound CTX-M-15 active site details.....                                | S6      |
| Figure S2. Avibactam electron density for carbamylated CTX-M-15, OXA-48 and OXA-10.....              | S7      |
| Figure S3. CTX-M-15 variants are stable in solution.....                                             | S8      |
| Figure S4. Interactions between avibactam and active site residues in OXA-48 and OXA-10.....         | S9      |
| Figure S5. Carboxylation of the SXXK lysine in OXA-48 and OXA-10.....                                | S10     |
| Figure S6. Comparison of carbamyl-avibactam CTX-M-15, OXA-48 and AmpC co-crystal structures.....     | S11     |
| Figures 7-16. ESI-LC-MS trace overlays of avibactam incubated with $\beta$ -lactamase at pH 7.5..... | S12-S21 |
| References.....                                                                                      | S22     |

## METHODS

### Dynamic light scattering.

Dynamic light scattering was performed using a Zetasizer NanoS (Malvern Instruments). All measurements were taken using a 12  $\mu$ L quartz cell (ZEN2112) at 25°C. Size distribution of the samples was calculated based on the correlation function provided by the Zetasizer Nano S software.

### LC-MS analysis of avibactam-CTX-M-15 mutants.

LC-ESI-MS data were obtained by using an Agilent 1100 Series LC system (Agilent Technologies Canada, Inc.) and a QTRAP LC/MS/MS System (Applied Biosystems). The reverse phase HPLC was performed using C<sub>18</sub> column (SunFire C18 5  $\mu$ m, 4.6x50 mm, Waters) with Agilent 1100 LC binary pump at a flow rate of 1 mL/min, under the following conditions: isocratic 5% solvent B (0.05% formic acid in acetonitrile) and 95% solvent A (0.05% formic acid in water) for 1 min, followed by a linear gradient to 97% B over 10 min. CTX-M-15 WT, K73A, N104A, S130A, N132A, E166Q, K234A; and KPC-2 (7  $\mu$ M) were incubated with 14  $\mu$ M avibactam in buffer containing 30 mM HEPES pH 7.5, 300 mM NaCl, and 20 % v/v glycerol and analyzed at both 0 h and 24 h.

### Protein expression and purification for crystallographic studies.

The *P. aeruginosa* OXA-10 protein (UniProt ID: P14489) corresponding to the mature sequence (20-266) was cloned, overexpressed and purified as previously described<sup>1</sup>.

The *E. coli* CTX-M-15 and *Klebsiella pneumoniae* OXA-48 expression vectors were constructed as described above. The expression vectors were then transformed into *E. coli* BL21 DE3 cells. The cells were grown in Lauria Bertani (LB) broth at 37°C until an OD<sub>600</sub> of 0.7 was reached at which point the culture was cooled to room temperature. Protein expression was induced by addition of 1mM isopropyl  $\beta$ -D-1-thiogalactopyranoside (IPTG) and the cultures were grown at 22°C for 12-16 hours. The cells (~20g) were then harvested and resuspended in 50mL lysis buffer (50mM Tris, pH 7.5, 350mM NaCl, and one complete, EDTA-free protease inhibitor tablet from Roche). The cells were lysed by two passes on a French Press at ~12,000 p.s.i., and the lysate was centrifuged (45,000 rpm in a Beckman 70 Ti rotor) for 35 minutes. The supernatant was then filtered using a 0.22  $\mu$ m syringe filter and passed through a 1mL Hi-Trap HP His column, which was pre-equilibrated in lysis buffer. Elution buffer (50 mM Tris, pH 7.5, 350mM NaCl, 1M imidazole) was used to elute the His-tagged proteins from the column with a gradient of imidazole from 0 to 500mM in 50 minutes. Fractions enriched in the protein of interest were pooled and 1U/mL of bovine  $\alpha$ -thrombin (Roche) was added and the samples were incubated overnight at 4°C. Samples were then exchanged via a 10 kDa cut-off Amicon centrifugation concentrator into crystallization buffer (20mM Tris, pH 7.5, 100mM NaCl). Samples were passed over a Superdex 200 column using crystallization buffer, as running buffer and pooled fractions were concentrated to 30 mg/mL for CTX-M-15, 50 mg/mL for OXA-48 and 10mg/mL for OXA-10.

## TABLES

Table S1. Data collection and refinement statistics.

|                                                                                                                                                                                               | CTX-M-15-<br>AVI                                                                        | OXA-10-AVI                                                                              | OXA-48-<br>AVI8.5                                                                       | OXA-48-<br>AVI7.5                                                                         | OXA-48-<br>AVI6.5                                                                         | OXA-48-<br>Native                                                                         |
|-----------------------------------------------------------------------------------------------------------------------------------------------------------------------------------------------|-----------------------------------------------------------------------------------------|-----------------------------------------------------------------------------------------|-----------------------------------------------------------------------------------------|-------------------------------------------------------------------------------------------|-------------------------------------------------------------------------------------------|-------------------------------------------------------------------------------------------|
| <b>Data collection</b>                                                                                                                                                                        |                                                                                         |                                                                                         |                                                                                         |                                                                                           |                                                                                           |                                                                                           |
| Space group                                                                                                                                                                                   | P <sub>2</sub> <sub>1</sub>                                                             | P <sub>2</sub> <sub>1</sub> 2 <sub>1</sub> 2 <sub>1</sub>                               | P <sub>3</sub> <sub>2</sub>                                                             | P <sub>3</sub> <sub>2</sub>                                                               | P <sub>2</sub> <sub>1</sub> 2 <sub>1</sub> 2 <sub>1</sub>                                 | P <sub>2</sub> <sub>2</sub> 2 <sub>1</sub> 2 <sub>1</sub>                                 |
| Cell dimensions <br>a, b, c (Å)                                                                              | 62.0, 60.6,<br>71.5                                                                     | 48.6, 96.5,<br>125.7                                                                    | 142.0, 142.0,<br>52.4                                                                   | 142.8, 142.8,<br>52.4                                                                     | 64.1, 108.1,<br>162.8                                                                     | 43.4, 102.9,<br>124.7                                                                     |
| <br> (°)                    | 90, 104, 90                                                                             | 90, 90, 90                                                                              | 90, 90, 120                                                                             | 90, 90, 120                                                                               | 90, 90, 90                                                                                | 90, 90, 90                                                                                |
| Resolution (Å)                                                                                                                                                                                | 34.7-1.6 (1.69-<br>1.60)                                                                | 52.66-1.70<br>(1.73-1.70)                                                               | 46.64-2.00<br>(2.11-2.00)                                                               | 52.42-2.10<br>(2.21-2.10)                                                                 | 65.03-2.54<br>(2.65-2.54)                                                                 | 41.6-1.70<br>(1.73-1.70)                                                                  |
| R <sub>merge</sub> <br>I /  | 0.052(0.296)<br>13.7(3.5)                                                               | 0.040(0.290)<br>24.5(5.2)                                                               | 0.090(0.295)<br>6.1(2.9)                                                                | 0.096(0.457)<br>8.5(2.9)                                                                  | 0.065(0.150)<br>12.7(6.1)                                                                 | 0.055(0.424)<br>12.1(2.3)                                                                 |
| Completeness (%)                                                                                                                                                                              | 96.7(95.2)                                                                              | 98.0(99.9)                                                                              | 99.2(99.4)                                                                              | 99.8(100.0)                                                                               | 91.2(91.4)                                                                                | 99.7(99.9)                                                                                |
| Redundancy                                                                                                                                                                                    | 3.9(3.9)                                                                                | 4.8(4.9)                                                                                | 2.5(2.5)                                                                                | 3.4(3.4)                                                                                  | 4.0(3.8)                                                                                  | 5.0(4.9)                                                                                  |
| <b>Refinement</b>                                                                                                                                                                             |                                                                                         |                                                                                         |                                                                                         |                                                                                           |                                                                                           |                                                                                           |
| Resolution (Å)                                                                                                                                                                                | 34.7-1.60                                                                               | 52.66-1.70                                                                              | 46.64-2.00                                                                              | 52.42-2.10                                                                                | 65.03-2.54                                                                                | 41.6-1.70                                                                                 |
| No. reflections                                                                                                                                                                               | 65645(9368)                                                                             | 64493(3478)                                                                             | 76256(11167)                                                                            | 69650(10200)                                                                              | 34471(4158)                                                                               | 62226(3297)                                                                               |
| R <sub>work</sub> / R <sub>free</sub>                                                                                                                                                         | 0.165/0.198                                                                             | 0.185/0.230                                                                             | 0.171%/0.205                                                                            | 0.172/0.205                                                                               | 0.184/0.222                                                                               | 0.192/0.226                                                                               |
| Avibactam occupancy<br>chainA, chainB, etc.                                                                                                                                                   | 1.00, 1.00                                                                              | 1.00, 1.00                                                                              | 0.70, 0.70,<br>1.00, 1.00                                                               | 1.00, 1.00,<br>1.00, 1.00                                                                 | 1.00, 1.00,<br>1.00, 1.00                                                                 | N/A, N/A                                                                                  |
| No. atoms                                                                                                                                                                                     |                                                                                         |                                                                                         |                                                                                         |                                                                                           |                                                                                           |                                                                                           |
| Protein                                                                                                                                                                                       | 3930                                                                                    | 3957                                                                                    | 8000                                                                                    | 8043                                                                                      | 7972                                                                                      | 3963                                                                                      |
| Ligand/ion                                                                                                                                                                                    | 34                                                                                      | 38                                                                                      | 68                                                                                      | 68                                                                                        | 68                                                                                        | N/A                                                                                       |
| Water                                                                                                                                                                                         | 549  | 468  | 362  | 480  | 203  | 372  |
| B-factors                                                                                                  |                                                                                         |                                                                                         |                                                                                         |                                                                                           |                                                                                           |                                                                                           |
| Protein                                                                                                                                                                                       | 17.8                                                                                    | 22.6                                                                                    | 40.2                                                                                    | 30.3                                                                                      | 34.1                                                                                      | 27.2                                                                                      |
| Ligand/ion                                                                                                                                                                                    | 17.8                                                                                    | 17.5                                                                                    | 36.7                                                                                    | 22.4                                                                                      | 35.4                                                                                      | N/A                                                                                       |
| Water                                                                                                                                                                                         | 27.4                                                                                    | 28.7                                                                                    | 37.6                                                                                    | 32.3                                                                                      | 29.2                                                                                      | 35.4                                                                                      |
| R.m.s. deviations                                                                                                                                                                             |                                                                                         |                                                                                         |                                                                                         |                                                                                           |                                                                                           |                                                                                           |
| Bond lengths (Å)                                                                                                                                                                              | 0.012                                                                                   | 0.012                                                                                   | 0.014                                                                                   | 0.012                                                                                     | 0.011                                                                                     | 0.014                                                                                     |
| Bond angles (°)                                                                                                                                                                               | 1.62                                                                                    | 1.70                                                                                    | 1.72                                                                                    | 1.68                                                                                      | 1.49                                                                                      | 1.53                                                                                      |
| Favored/allowed/<br>disallowed (%) <sup>+</sup>                                                                                                                                               | 98.2, 1.4, 0.4                                                                          | 97.8, 2.0, 0.2                                                                          | 97.6, 2.4, 0.0                                                                          | 97.2, 2.8, 0.0                                                                            | 97.9, 2.1, 0.0                                                                            | 97.7, 2.3, 0.0                                                                            |

\*All datasets correspond to diffraction data collected from a single crystal.

\*Values in parentheses are for highest-resolution shell.

\*Avibactam (AVI)

<sup>+</sup>phenix.ramalyze; “allowed” is the percentage remaining after “favored” and “outlier” residues are subtracted.

Table S2. Primers used in this study. Underline shows restriction sites.

| Primer        | Sequence (5'-3')                                 |
|---------------|--------------------------------------------------|
| CTX-M-15 F    | AATATCATATGCAAACGGCGGACGTACAGCA                  |
| CTX-M-15 R    | TATTAGAATTCTTACCGTCGGTGACGATTTTAGCC              |
| OXA-48 F      | GCTTCATATGGAATGGCAAGAAAACAAAAGTTGGAATGCT         |
| OXA-48 R      | CGTACTCGAGCTAGGGAATAATTTTTTTCCTGTTTGAGCAC        |
| K73A F        | GCGATGTGCAGCACCAGTGCGGTGATGG                     |
| K73A R        | CGCTACACGTCGTGGTCACGCCACTACC                     |
| N104A F       | CGAGTTGAGATCAAAAAATCTGACCTTGTTGCGTATAATCCGATTGC  |
| N104A R       | GCTCAACTCTAGTTTTTTTAGACTGGAACAACGCATATTAGGCTAACG |
| S130A F       | CGCTACAGTACGCGGATAACGTGGCGATGAATAAGC             |
| S130A R       | GCGATGTCATGCGCCTATTGCACCGCTACTTATTTCG            |
| N132A F       | GCTACAGTACAGCGATGCGGTGGCGATGAATAAGC              |
| N132A R       | CGATGTCATGTCGCTACGCCACCGCTACTTATTTCG             |
| E166Q F       | GCTGGGAGACGAAACGTTCCGTCTCGACC                    |
| E166Q R       | CGACCCTCTGCTTTGCAAGGCAGAGCTGG                    |
| K234A F       | GGTTGTGGGGGATGCGACCGGCAGC                        |
| K234A R       | CCAACACCCCCTACGCTGGCCGTCG                        |
| T7 terminator | GCTAGTTATTGCTCAGCGG                              |

Table S3. Kinetic values for the hydrolysis of nitrocefin by CTX-M-15 mutants.

| <b>Parameter</b>                                          | <b><i>WT</i></b>  | <b><i>K73A</i></b> | <b><i>N104A</i></b> | <b><i>S130A</i></b> | <b><i>N132A</i></b> | <b><i>E166Q</i></b> | <b><i>K234A</i></b> |
|-----------------------------------------------------------|-------------------|--------------------|---------------------|---------------------|---------------------|---------------------|---------------------|
| $K_m$ ( $\mu\text{M}$ )                                   | 9.9               | 13                 | 11                  | 33                  | 6.2                 | 8.3                 | 2.6                 |
| $k_{\text{cat}}$ ( $\text{s}^{-1}$ )                      | 57                | 4.1                | 85                  | 270                 | 55                  | 0.06                | 4.0                 |
| $k_{\text{cat}}/K_m$<br>( $\text{M}^{-1} \text{s}^{-1}$ ) | $5.8 \times 10^6$ | $3.1 \times 10^5$  | $8.2 \times 10^6$   | $8.2 \times 10^6$   | $8.8 \times 10^6$   | $7.9 \times 10^3$   | $1.6 \times 10^6$   |

## FIGURES

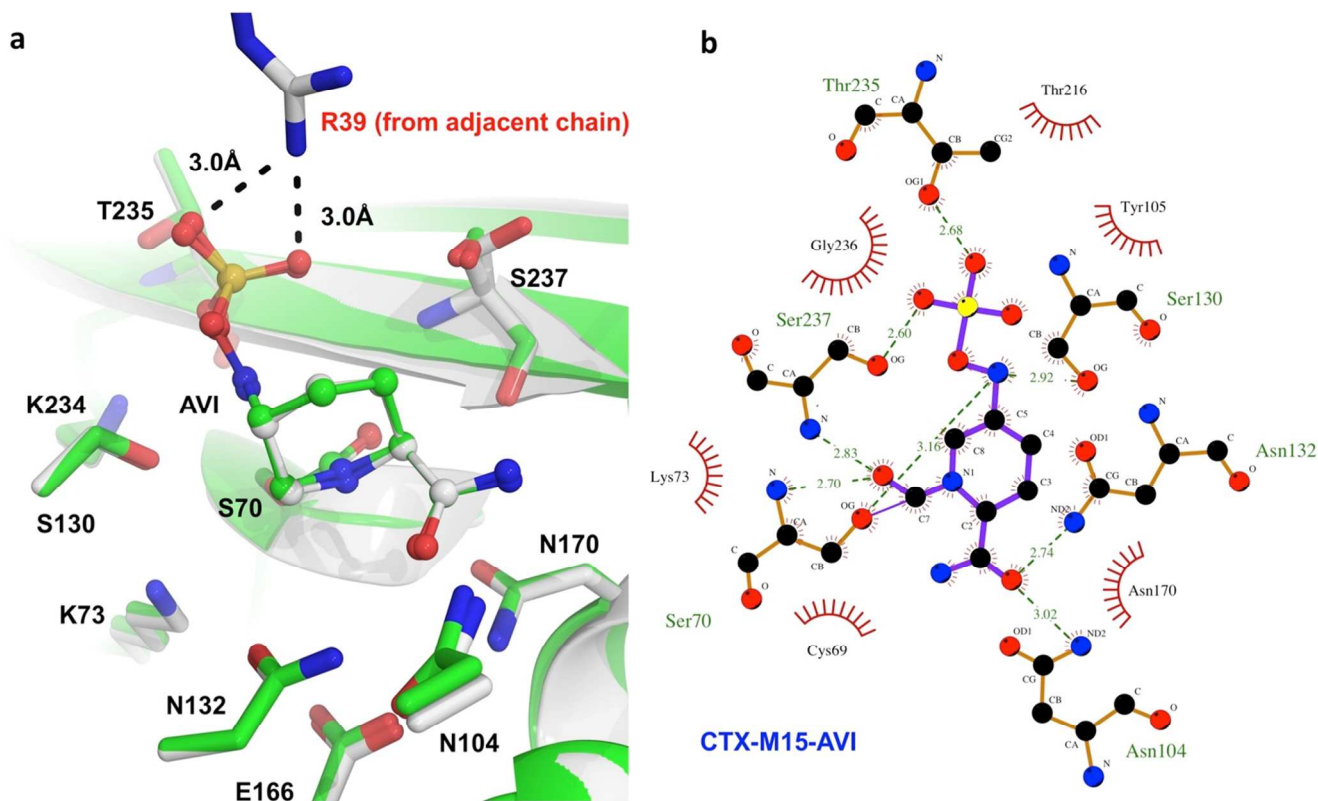

Figure S1. Carbamyl-avibactam bound CTX-M-15 active site details. (a) Active site overlay of carbamyl-avibactam and CTX-M-15 complex in spacegroups  $P2_12_12_1$  (PDB ID: 4HBU)<sup>2</sup>, and  $P2_1$  (PDB ID: XXXX). Carbon atoms for the 4HBU and XXXX active site residues and avibactam are displayed in grey and green, with all other non-carbon atoms colored by type (N, blue; O, red; S, yellow). The 4HBU and XXXX CTX-M-15 protein backbones are displayed as grey and green cartoons. (b) Protein-ligand interactions between CTX-M-15 and avibactam depicted in monomer A using LigPlot<sup>3</sup>. Avibactam and CTX-M-15 are displayed as purple and orange sticks with atoms colored by type. Hydrogen bonding and electrostatic interactions are shown as green dashes. Ligand-protein hydrophobic contacts are shown as curved red combs.

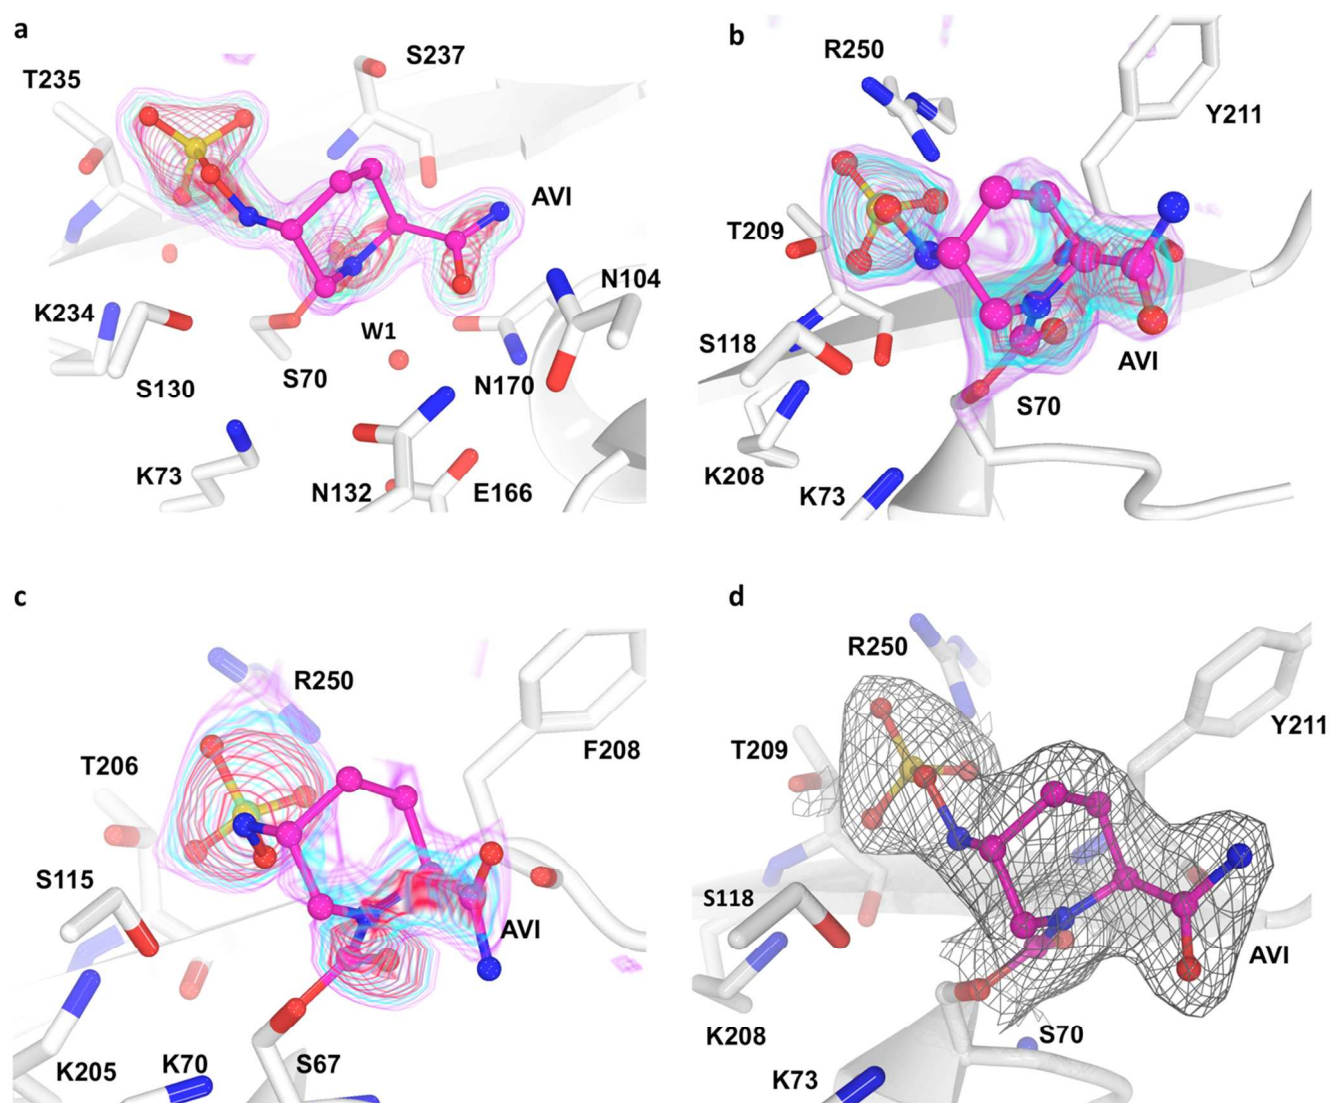

Figure S2. Avibactam electron density for carbamylated CTX-M-15, OXA-48 and OXA-10 crystal structures. In a-c, the  $F_o-F_c$  ligand omit maps are contoured at 3.0, 4.0 and 5.0  $\sigma$  and are shown as pink, cyan and red transparent surfaces. (a) Carbamyl-avibactam CTX-M-15 ligand omit  $F_o-F_c$  electron density. The CTX-M-15 cartoon is shown in white with selected active site residues displayed in stick representation and non-carbon atoms are colored by type. (b) and (c), Carbamyl-avibactam OXA-48-AVI7.5 and OXA-10 ligand omit  $F_o-F_c$  electron density. In B and C, the OXA-48-AVI7.5 and OXA-10 protein backbones are shown in white cartoon representation with selected active site residues displayed as white sticks with non-carbon atoms colored by type. In all panels, the carbamyl-avibactam is represented as pink sticks with atoms colored by type. (d) Carbamyl-avibactam OXA-48-AVI7.5 final refined  $2F_o-F_c$  electron density. The OXA-48-AVI7.5 protein and bound avibactam are displayed as in b. The  $2F_o-F_c$  electron density map is contoured at 1.0 $\sigma$  and is displayed as a grey mesh.

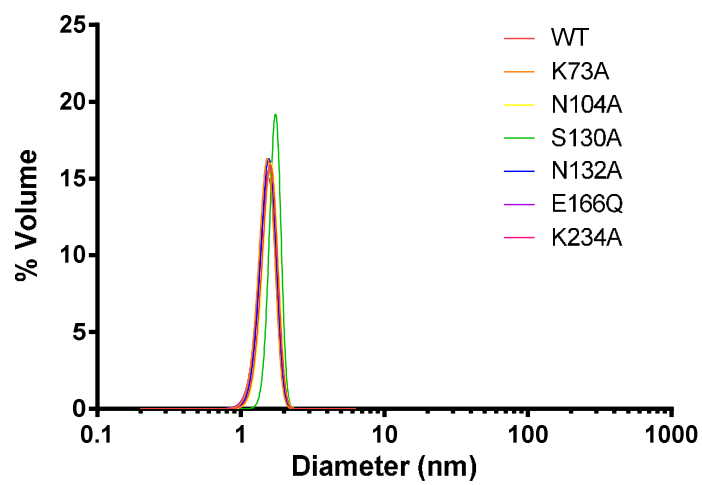

Figure S3. **CTX-M-15 variants are stable in solution.** Characterization of the particle size distribution for CTX-M-15 variants using dynamic light scattering.



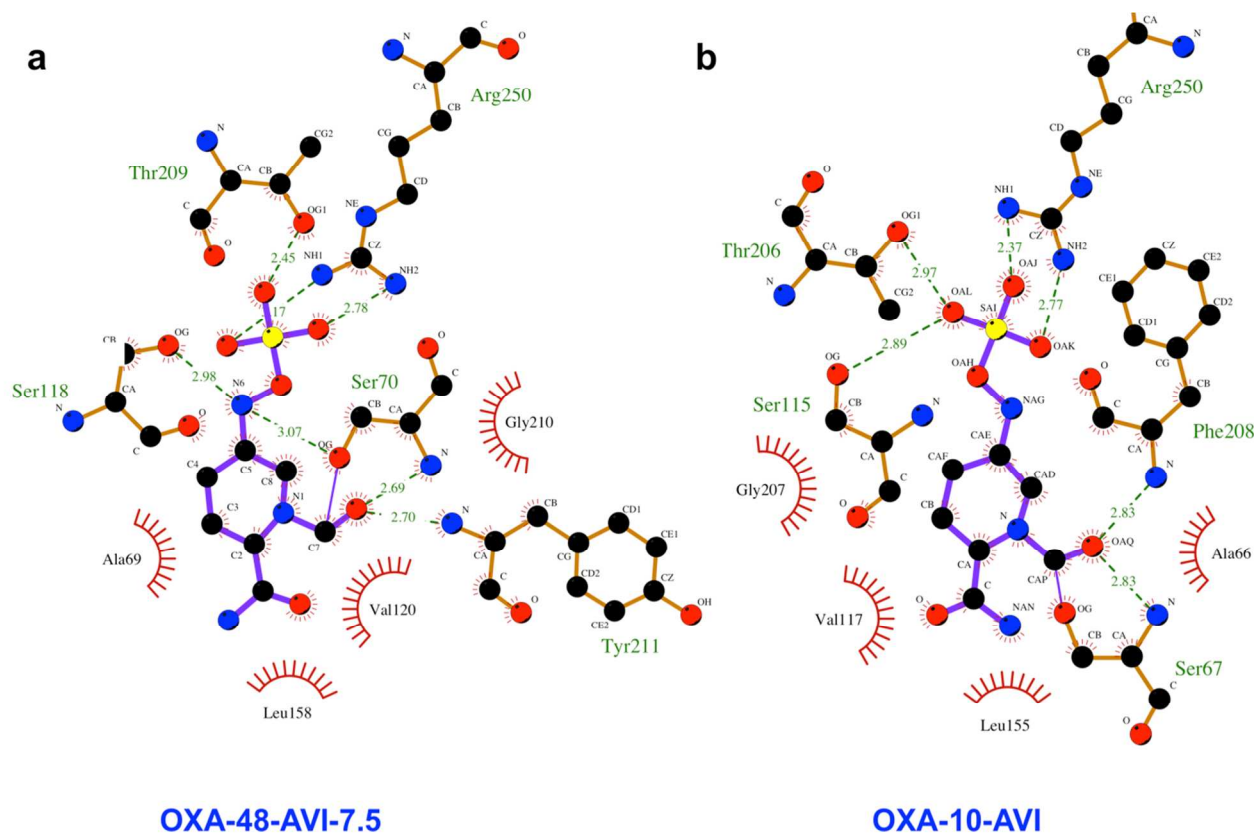

Figure S4. Interactions between avibactam and active site residues in OXA-48 and OXA-10. (a) and (b), Chain A-avibactam interactions in OXA-48-AVI-7.5 and OXA-10-AVI crystal complexes designed using LigPlot<sup>+</sup> <sup>3</sup>. In all panels, the carbamyl-avibactam and active site residues are displayed as purple and orange sticks with atoms colored by type. Hydrogen bonding and electrostatic interactions are shown as green dashes. Ligand-protein hydrophobic contacts are displayed as curved red combs.

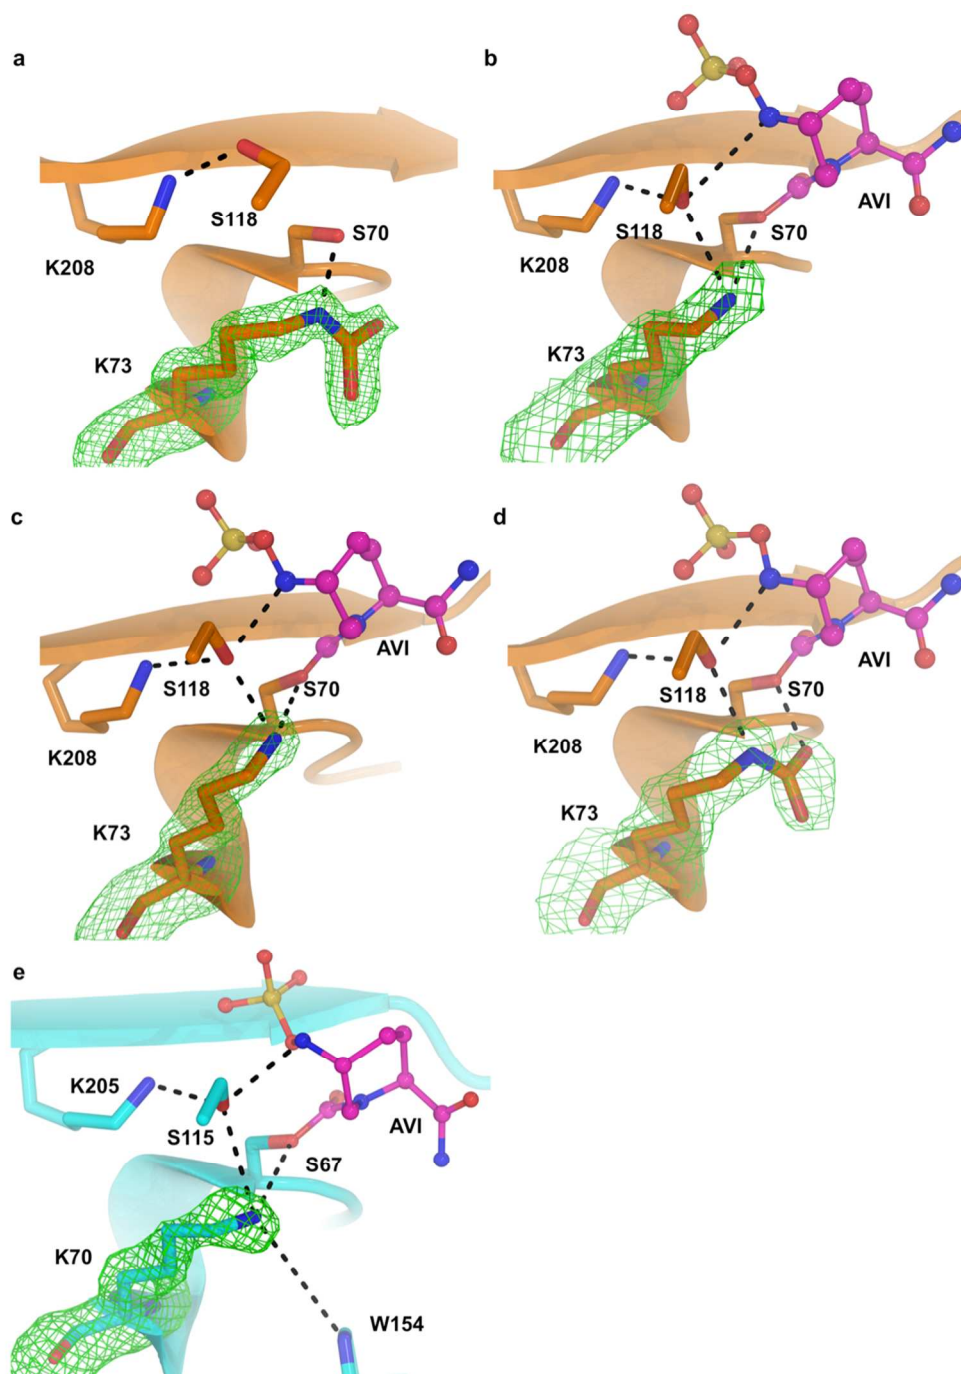

Figure S5. Carboxylation state of the SXXK lysine in OXA-48 and OXA-10. (a) Native OXA-48 (pH 7.5), chain A K73 omit  $F_o - F_c$  electron density. The OXA-48 protein backbone is displayed as an orange cartoon with selected active site residues shown as sticks with all non-carbon atoms colored by type. The  $F_o - F_c$  K73 omit electron density map is contoured at  $3.0\sigma$  and is shown as a green mesh. (b), (c) and (d) OXA-48-AVI6.5 (pH 6.5), OXA-48-AVI7.5 (pH 7.5) and OXA-48-AVI8.5 (pH 8.5), chain A K73 omit  $F_o - F_c$  electron density. The OXA-48 protein backbone, active site residues and  $F_o - F_c$  K73 omit electron density maps are shown as in A. The carbamyl-avibactam is represented as pink sticks with all non-carbon atoms colored by type. (e) OXA-10-AVI (pH 6.5) chain A K70 omit  $F_o - F_c$  electron density map. The OXA-10 protein backbone is displayed in cyan cartoon representation with selected active site residues shown as sticks with all non-carbon atoms colored by type. The  $F_o - F_c$  K70 omit electron density map is represented as in a. The carbamyl-avibactam is represented as in b.

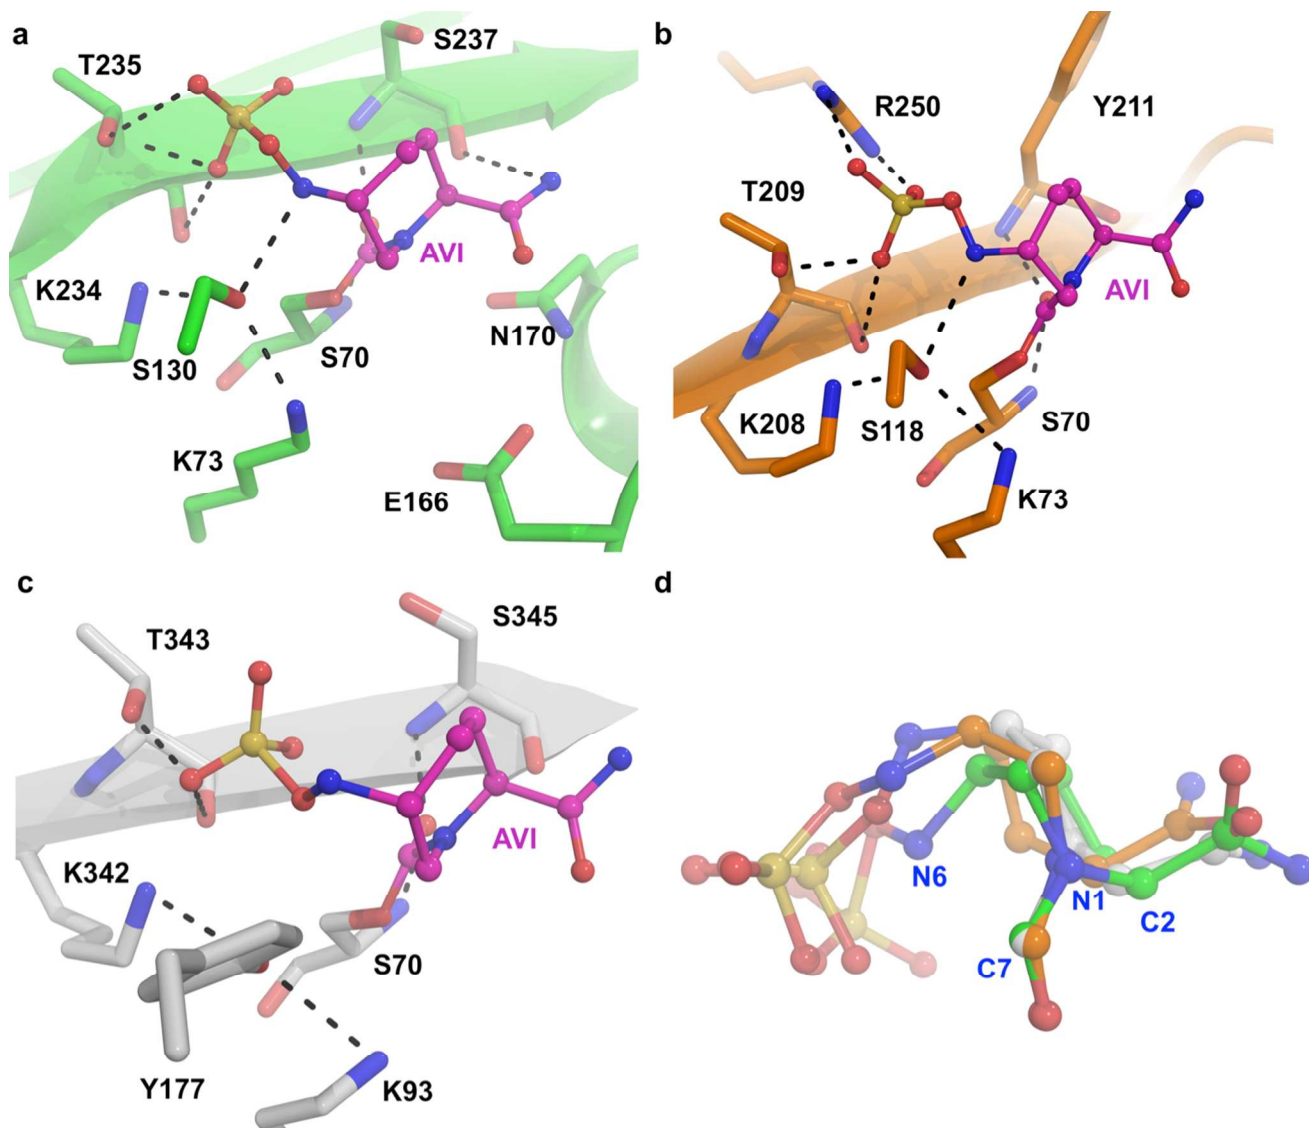

Figure S6. Comparison of carbamyl-avibactam CTX-M-15, OXA-48 and AmpC co-crystal structures. (a) Active site close-up of carbamyl-avibactam CTX-M-15. The carbon atoms of avibactam are pink with non-carbon atoms colored by atom type. The avibactam bound CTX-M-15 protein chain is represented as a green cartoon, with key active site residues shown as sticks with atoms colored by type. (b) and (c) Active site overlay of carbamyl-avibactam OXA-48, and AmpC (PDB ID: 4HEF)<sup>2</sup>. In b and c, the bound avibactam is represented as in a. The OXA-48 and AmpC protein chains are illustrated as orange and grey cartoons, and active site residues are depicted as sticks with non-carbon atoms colored by type. In a-c, hydrogen bonding and electrostatic interactions are shown as black dashes. (d) Overlay of carbamyl-avibactam from the CTX-M-15, OXA-48 and AmpC co-crystal structures (PDB ID's: XXXX, XXXX, 4HEF)<sup>2</sup>. Carbamyl-avibactam from the CTX-M-15, OXA-48 and AmpC structures are displayed as green, orange and white sticks with all non-carbon atoms colored by type. The carbamyl-avibactam C7 carbon, carbonyl oxygen and N1 atoms were fixed in the exact same positions.

Figures S7-S16. ESI-LC-MS trace overlays of avibactam incubated with  $\beta$ -lactamase as noted at pH 7.5 (Figs S7-S15). Samples were analyzed at 0 hours (red trace) and 2 hours (blue trace). Avibactam remains intact in all samples with the exception of KPC-2 and no enzyme pH 8.5 

### No enzyme

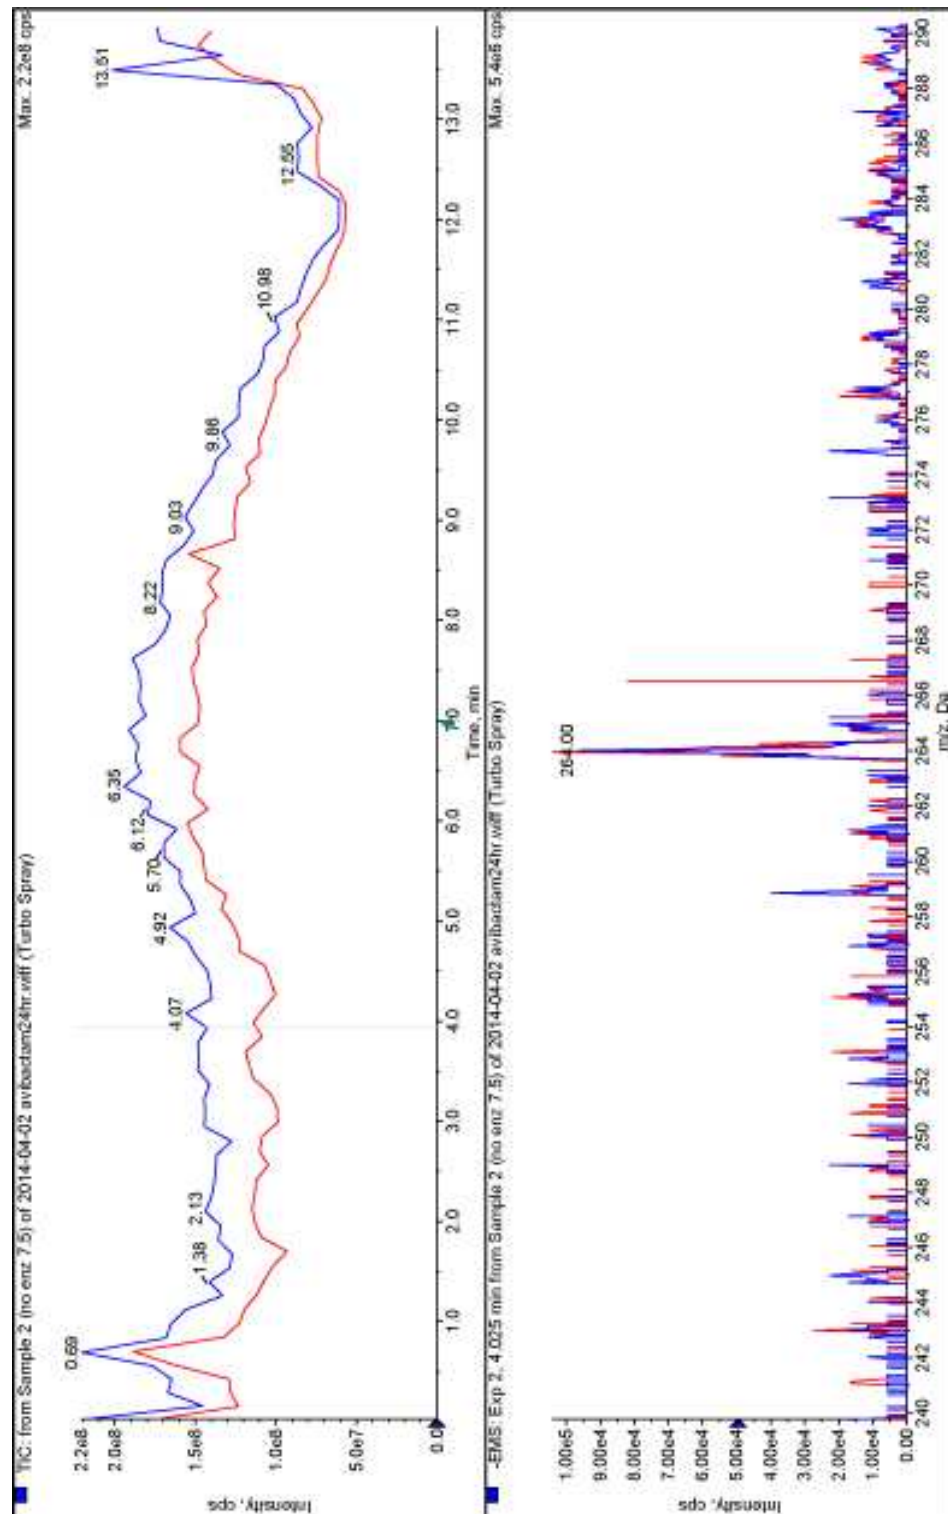

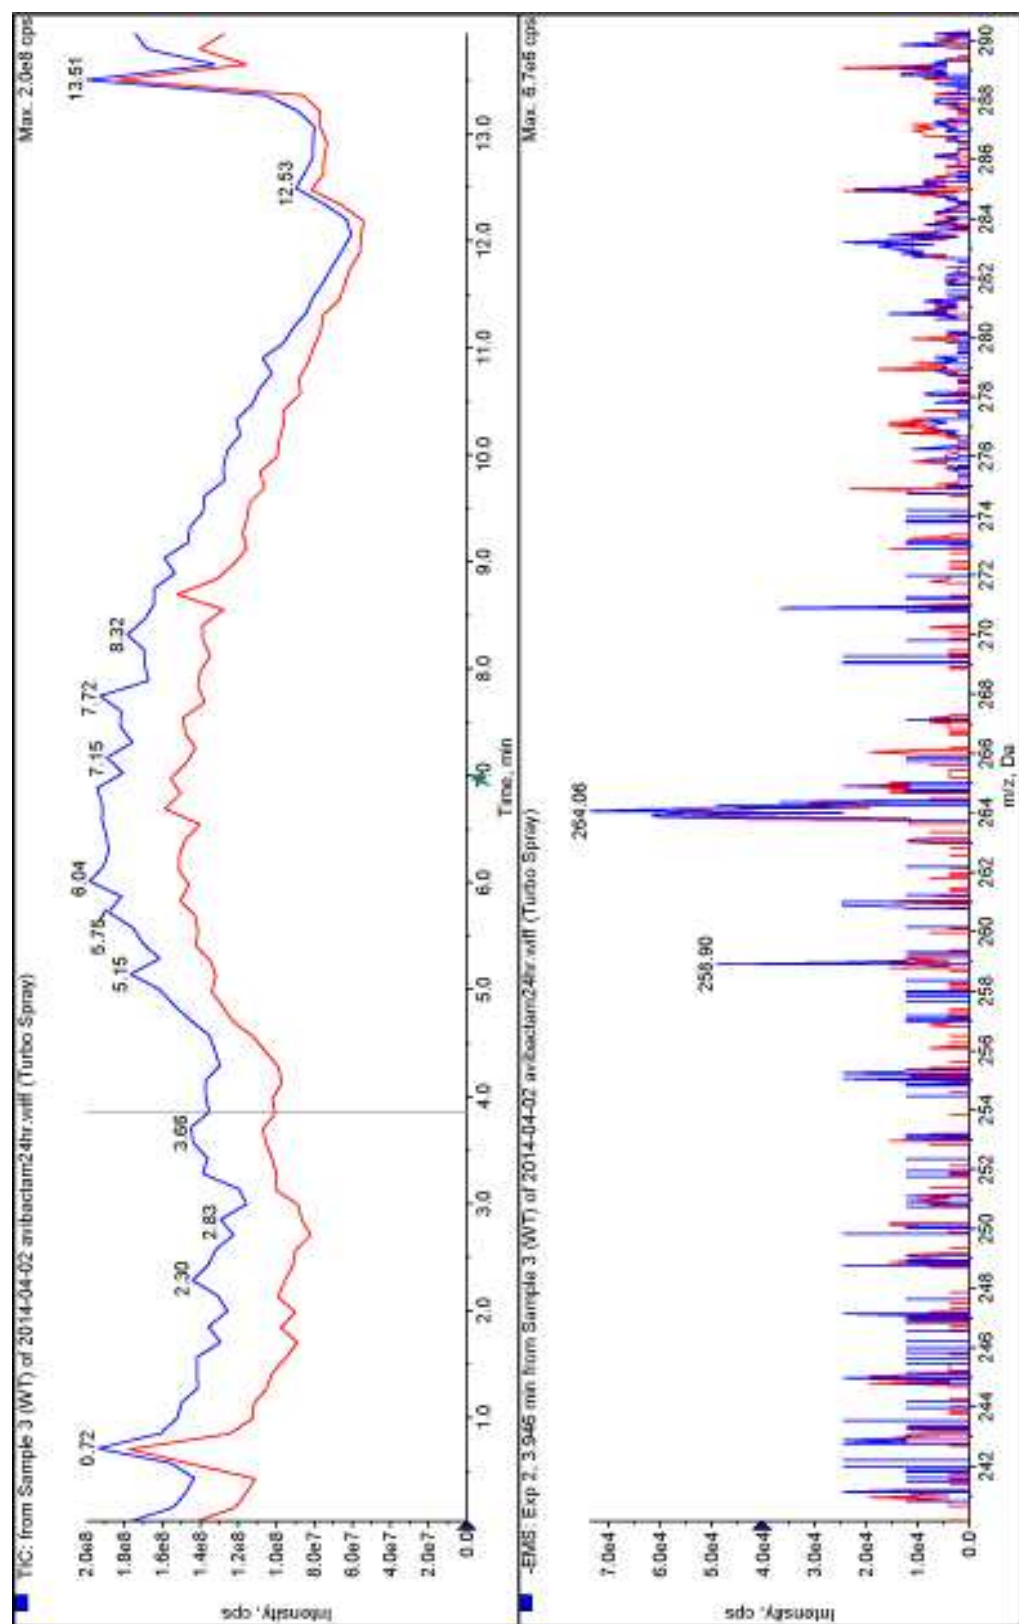



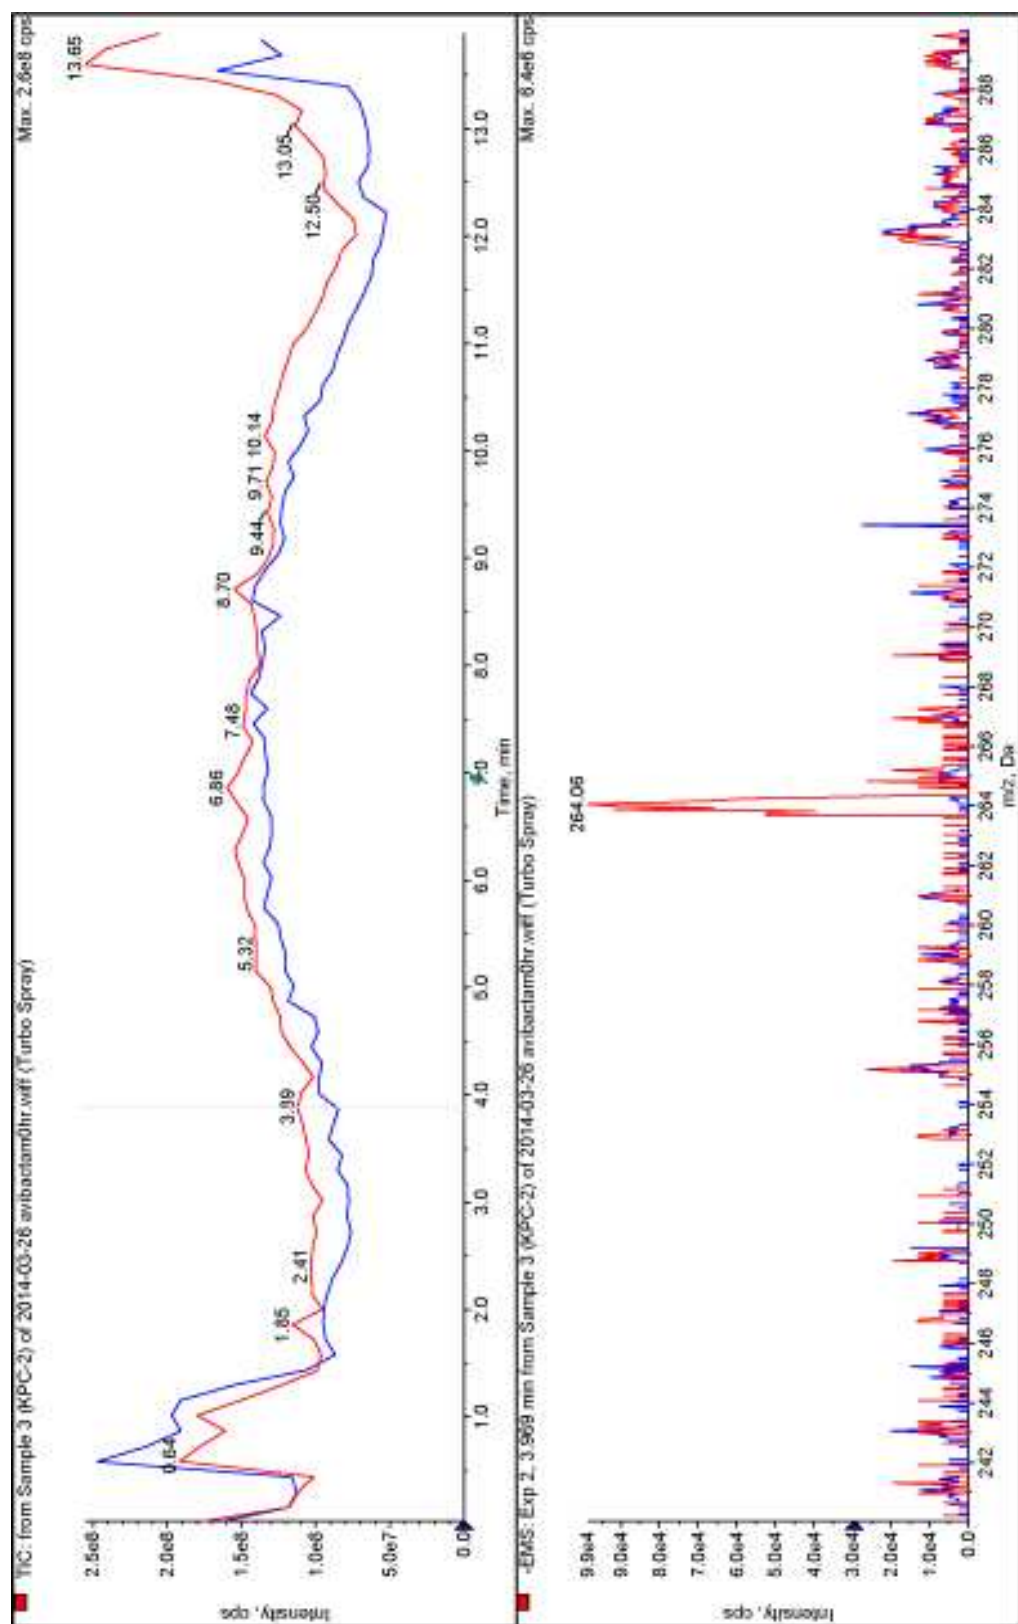

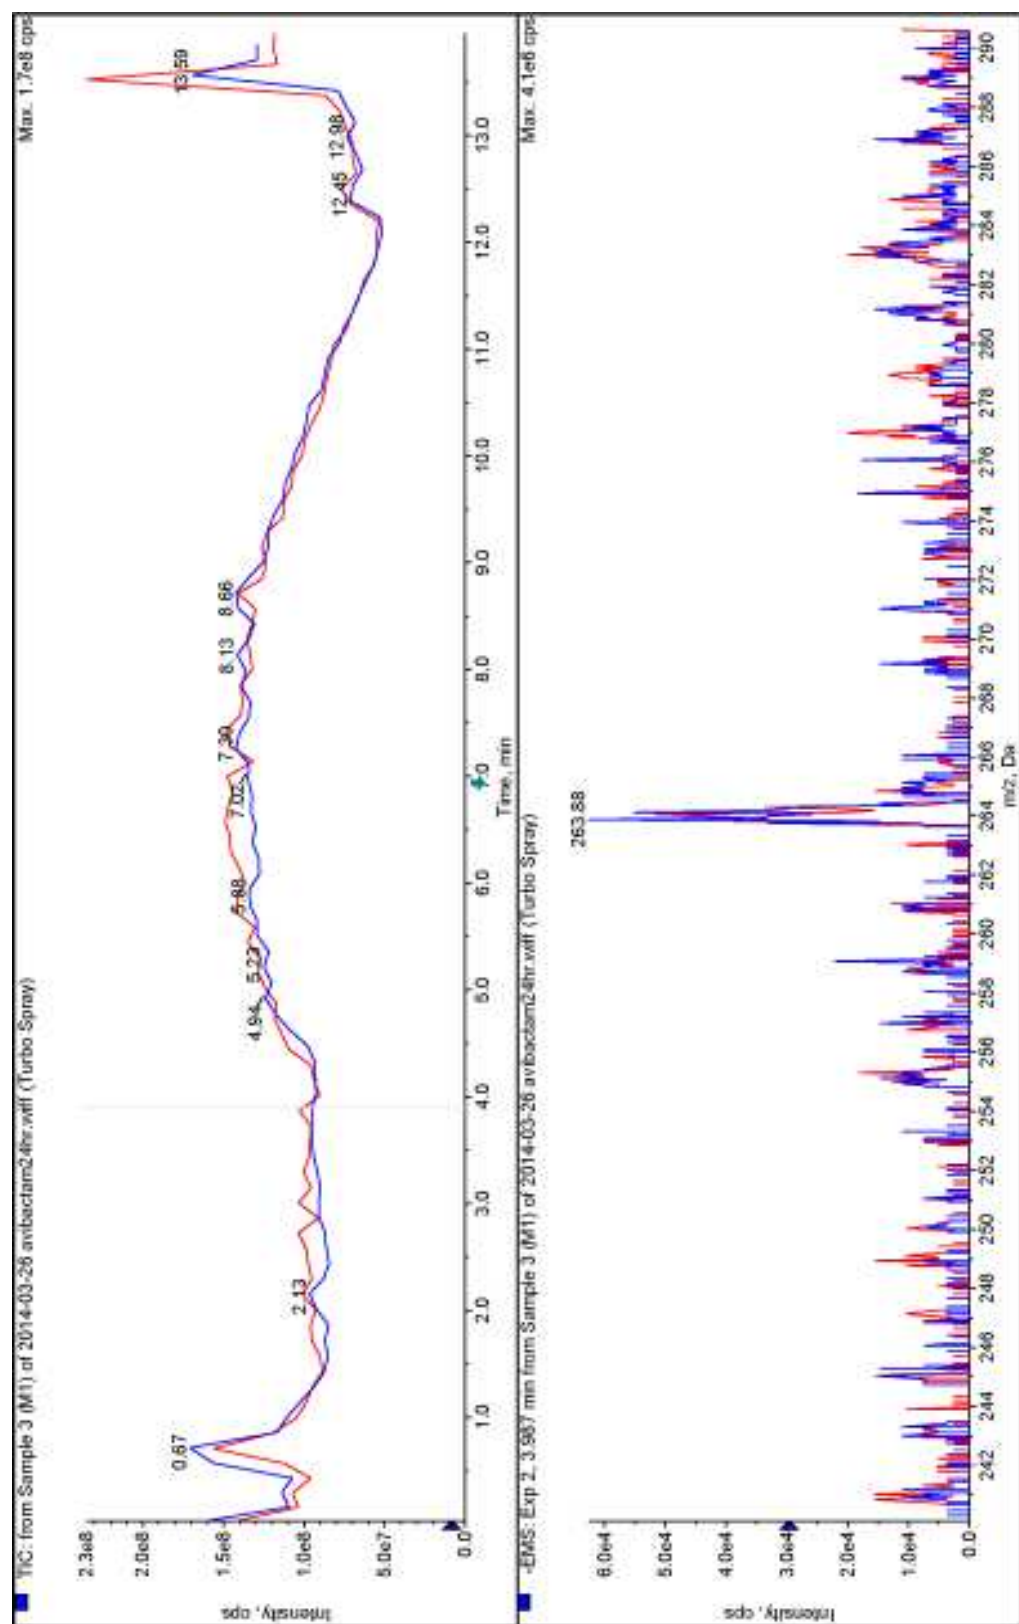

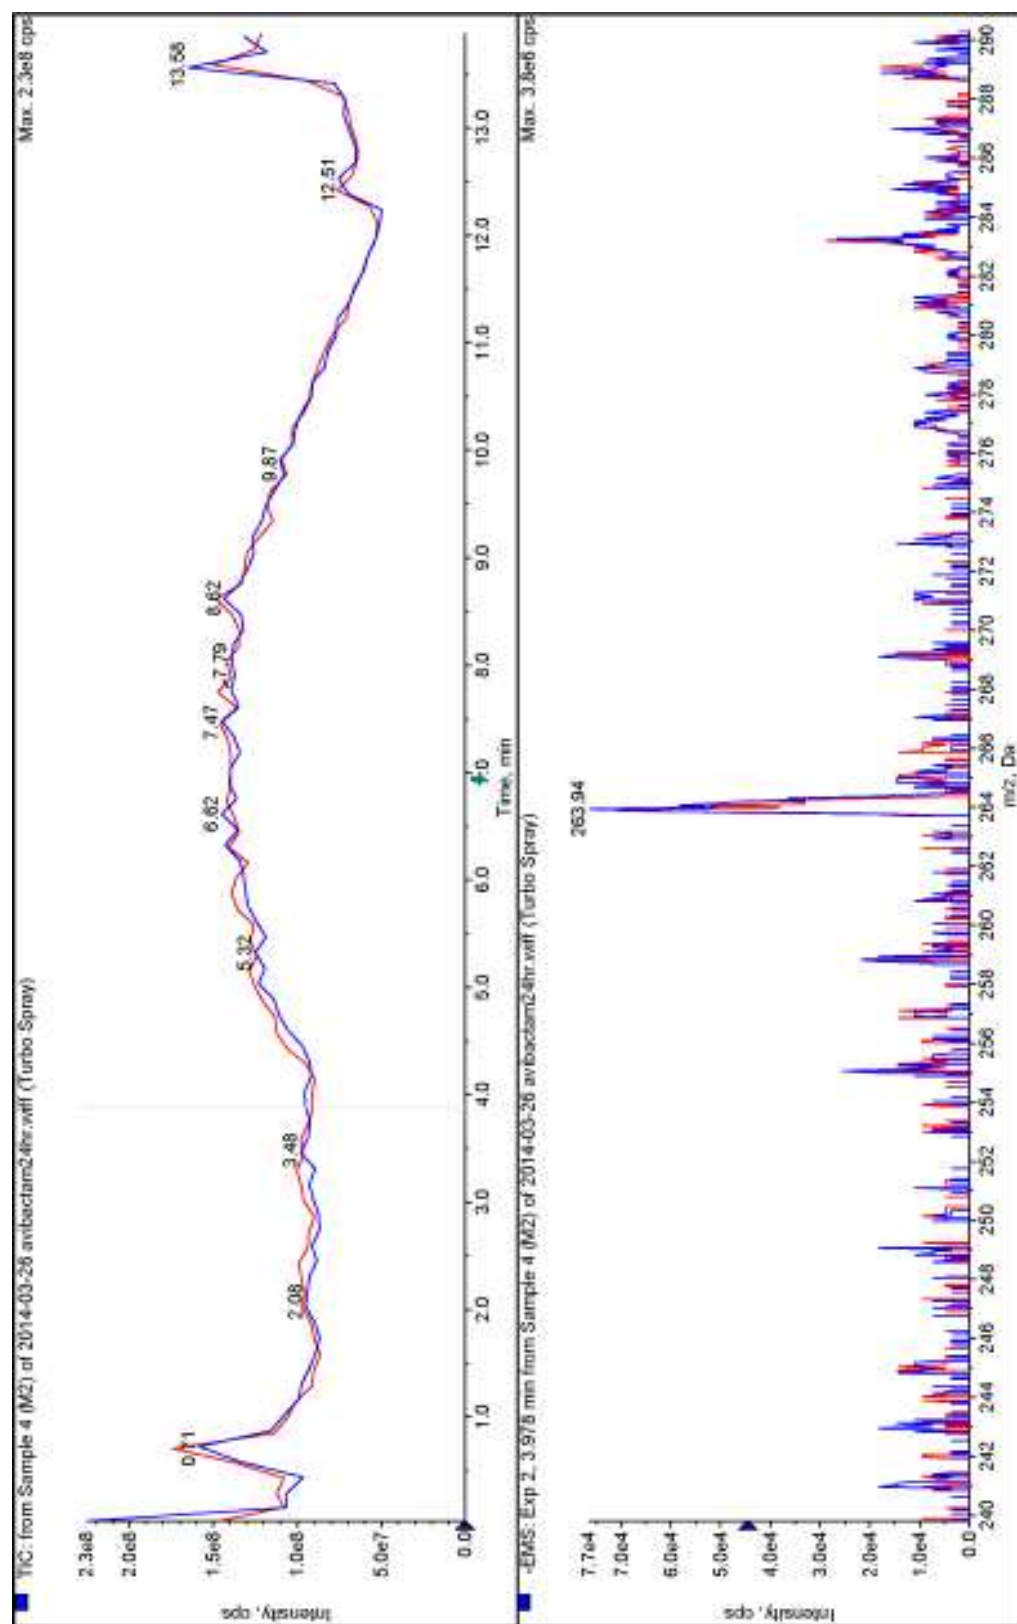



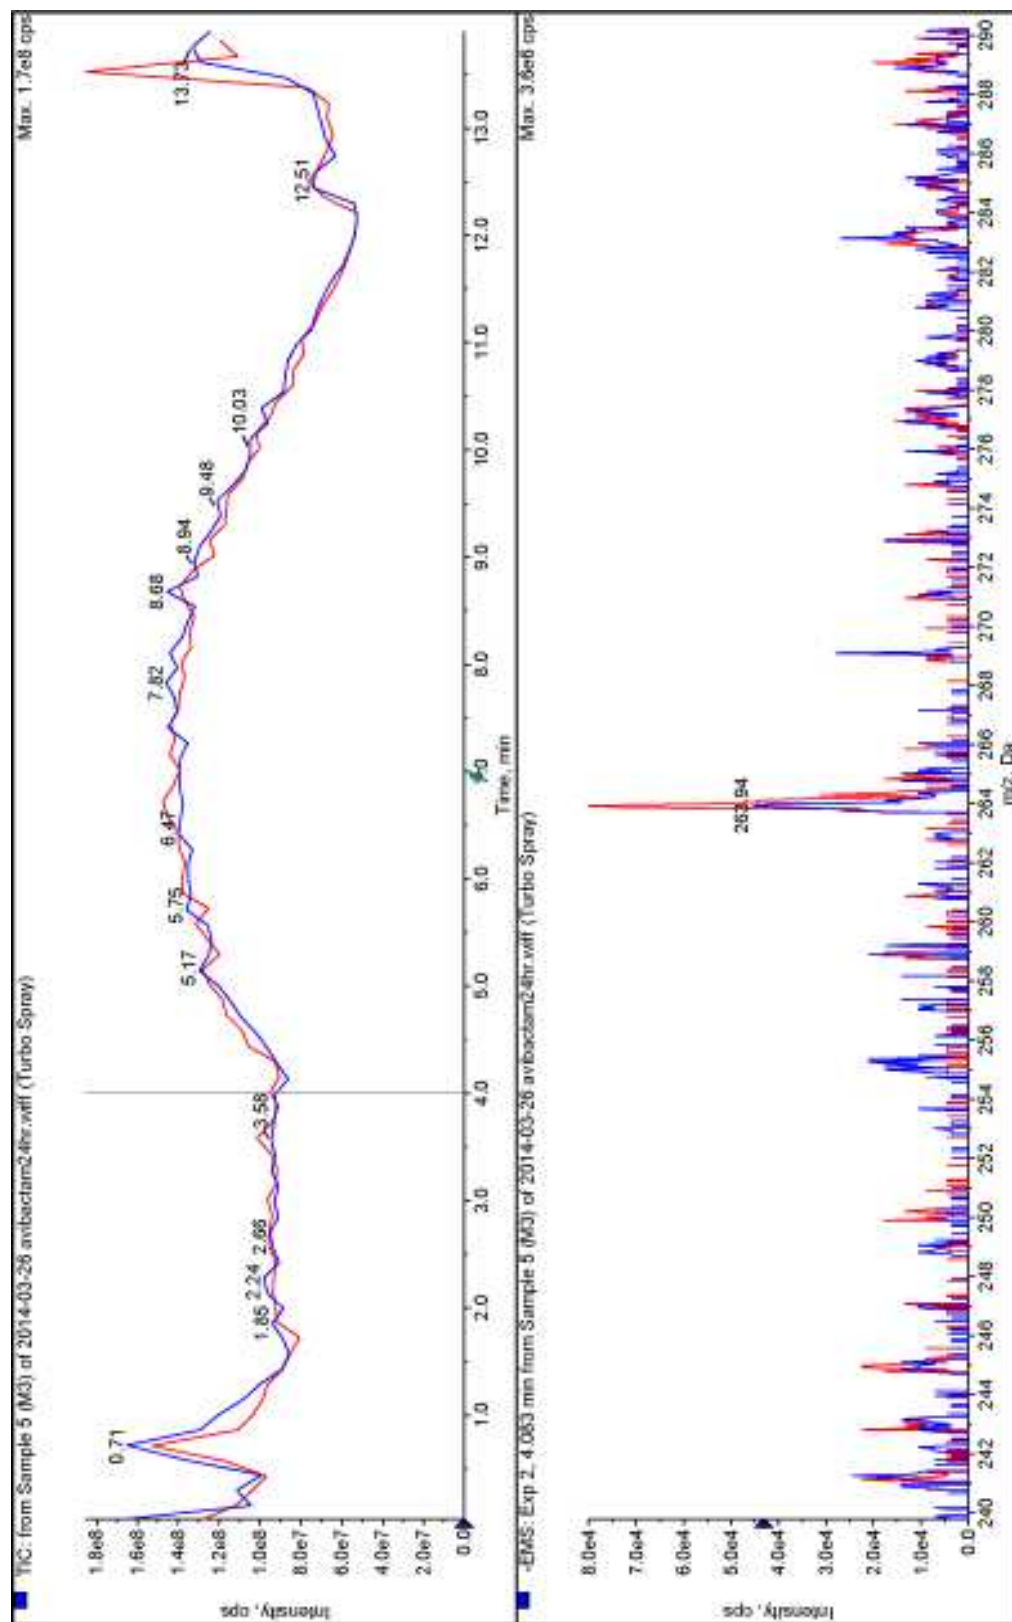

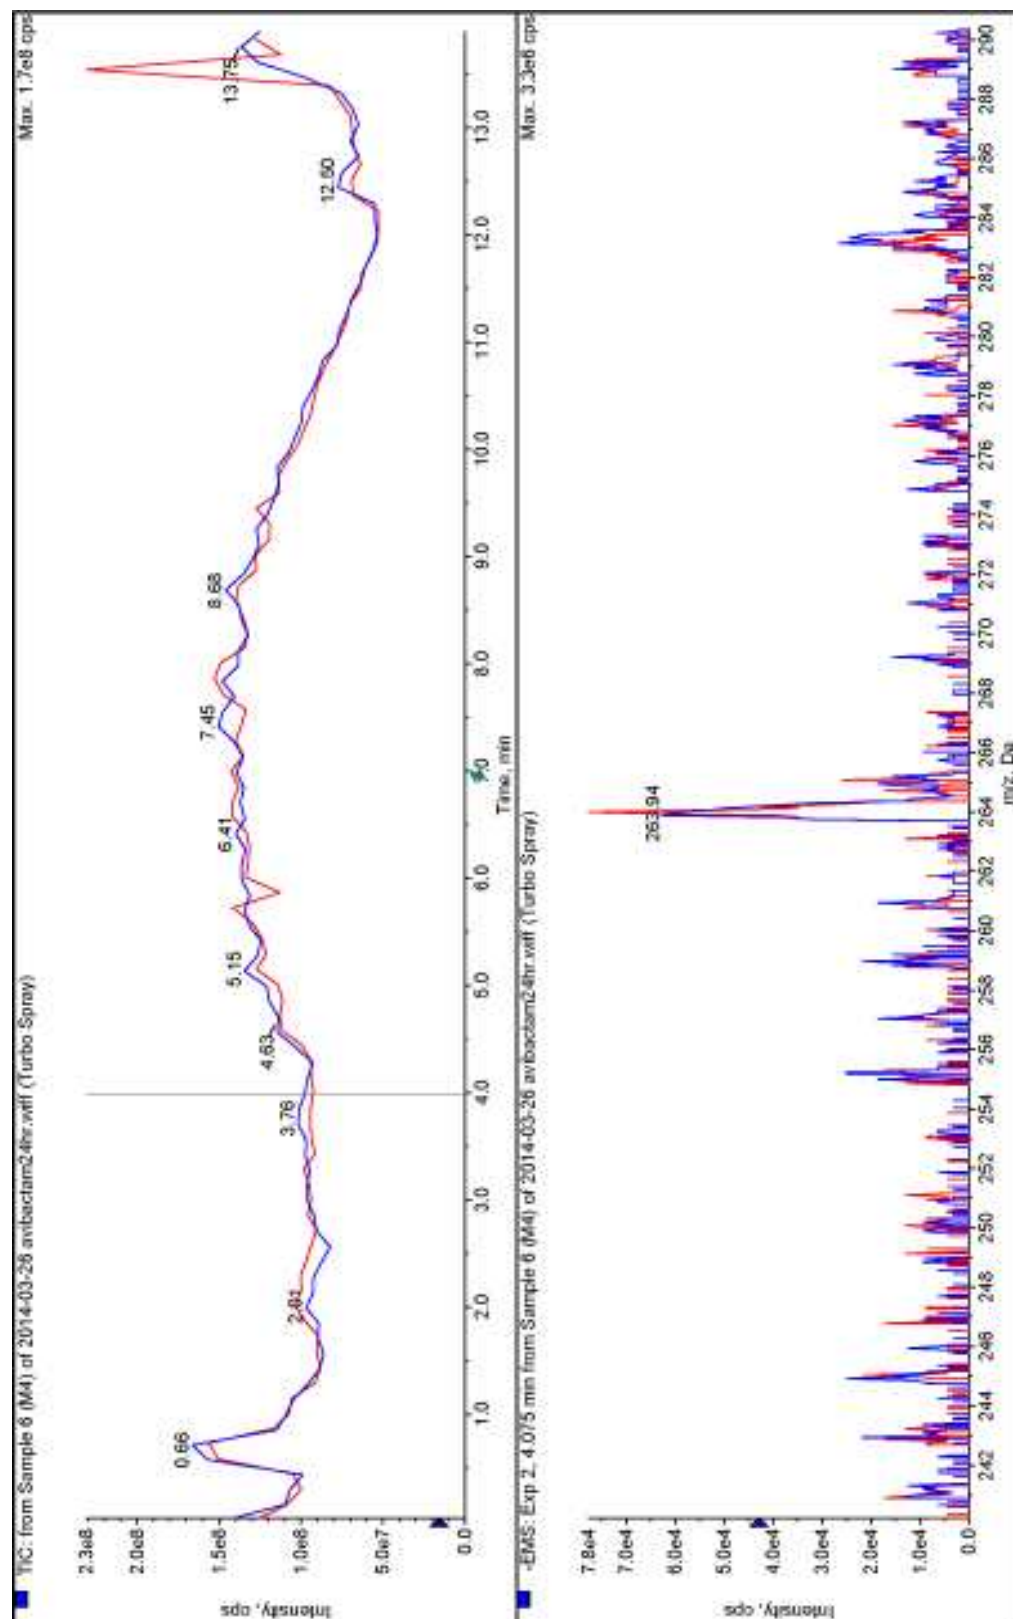

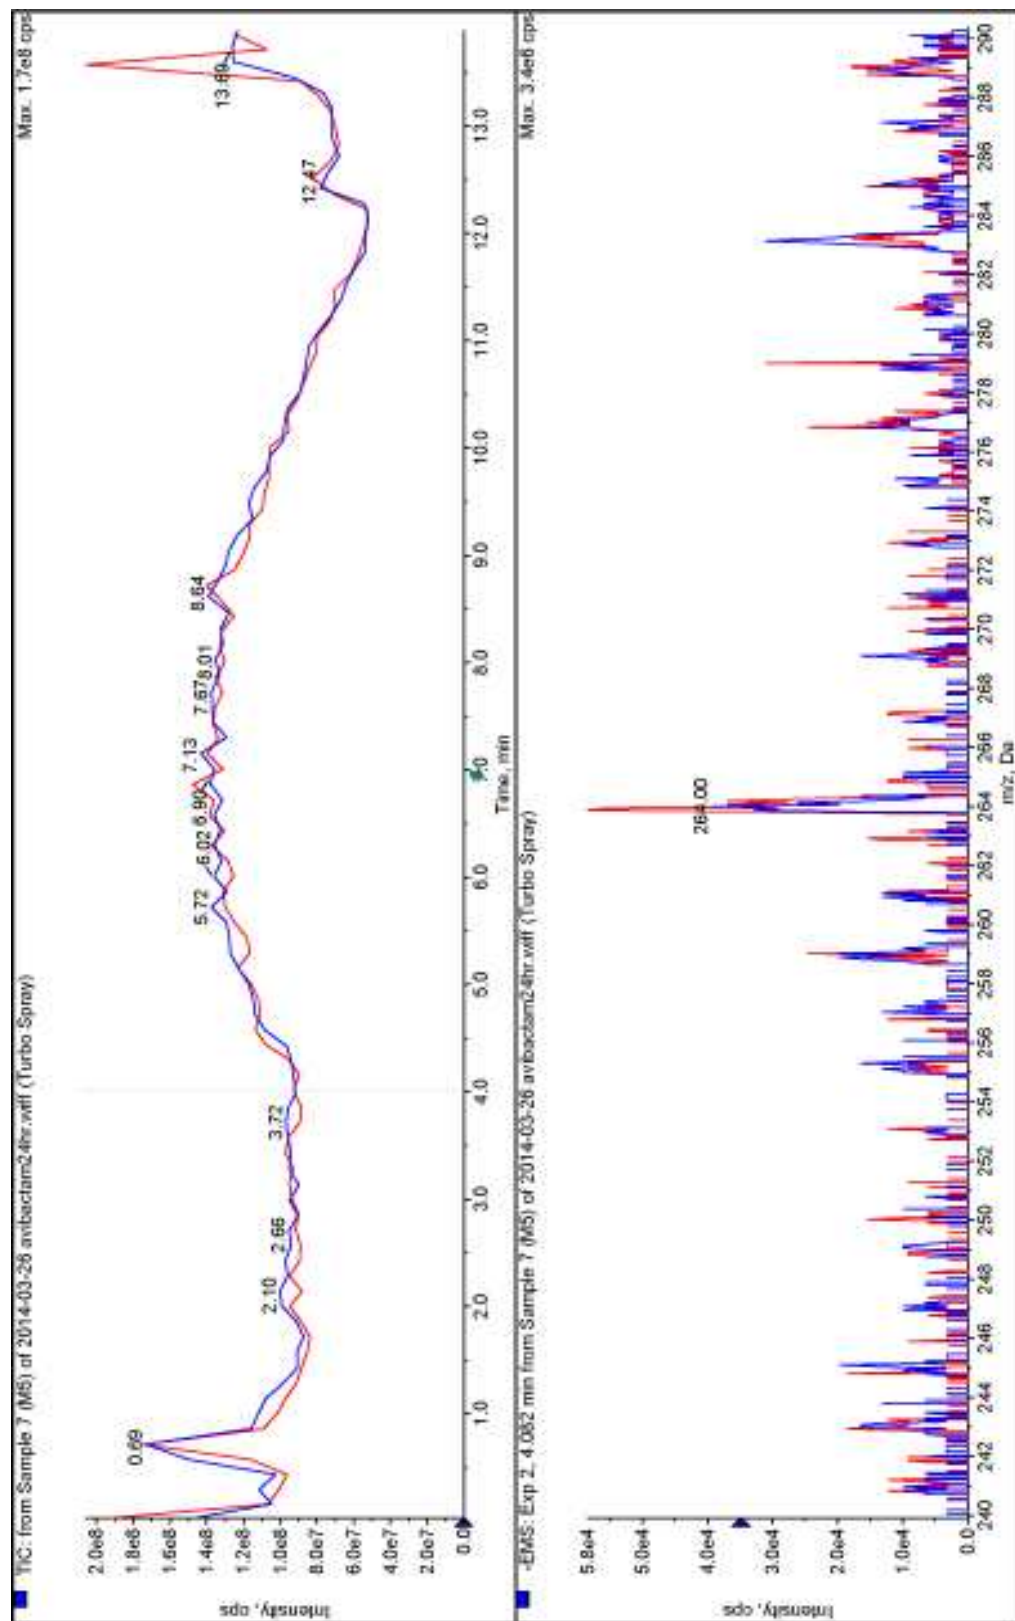

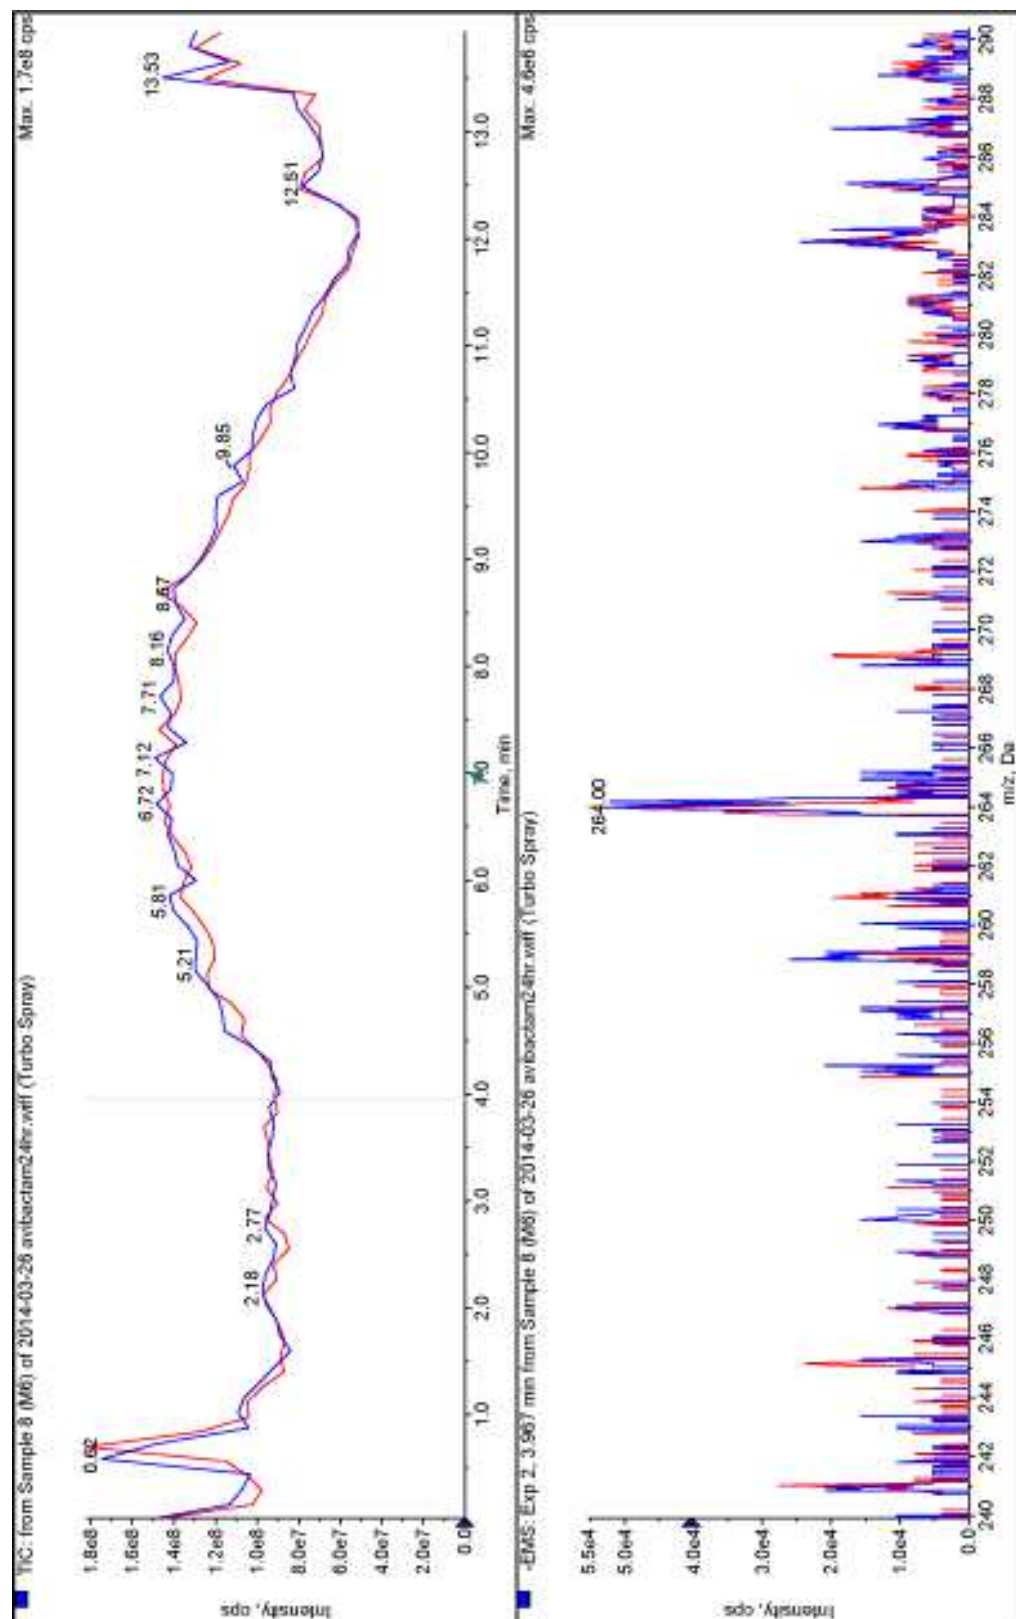

# No enzyme (pH 8.5)

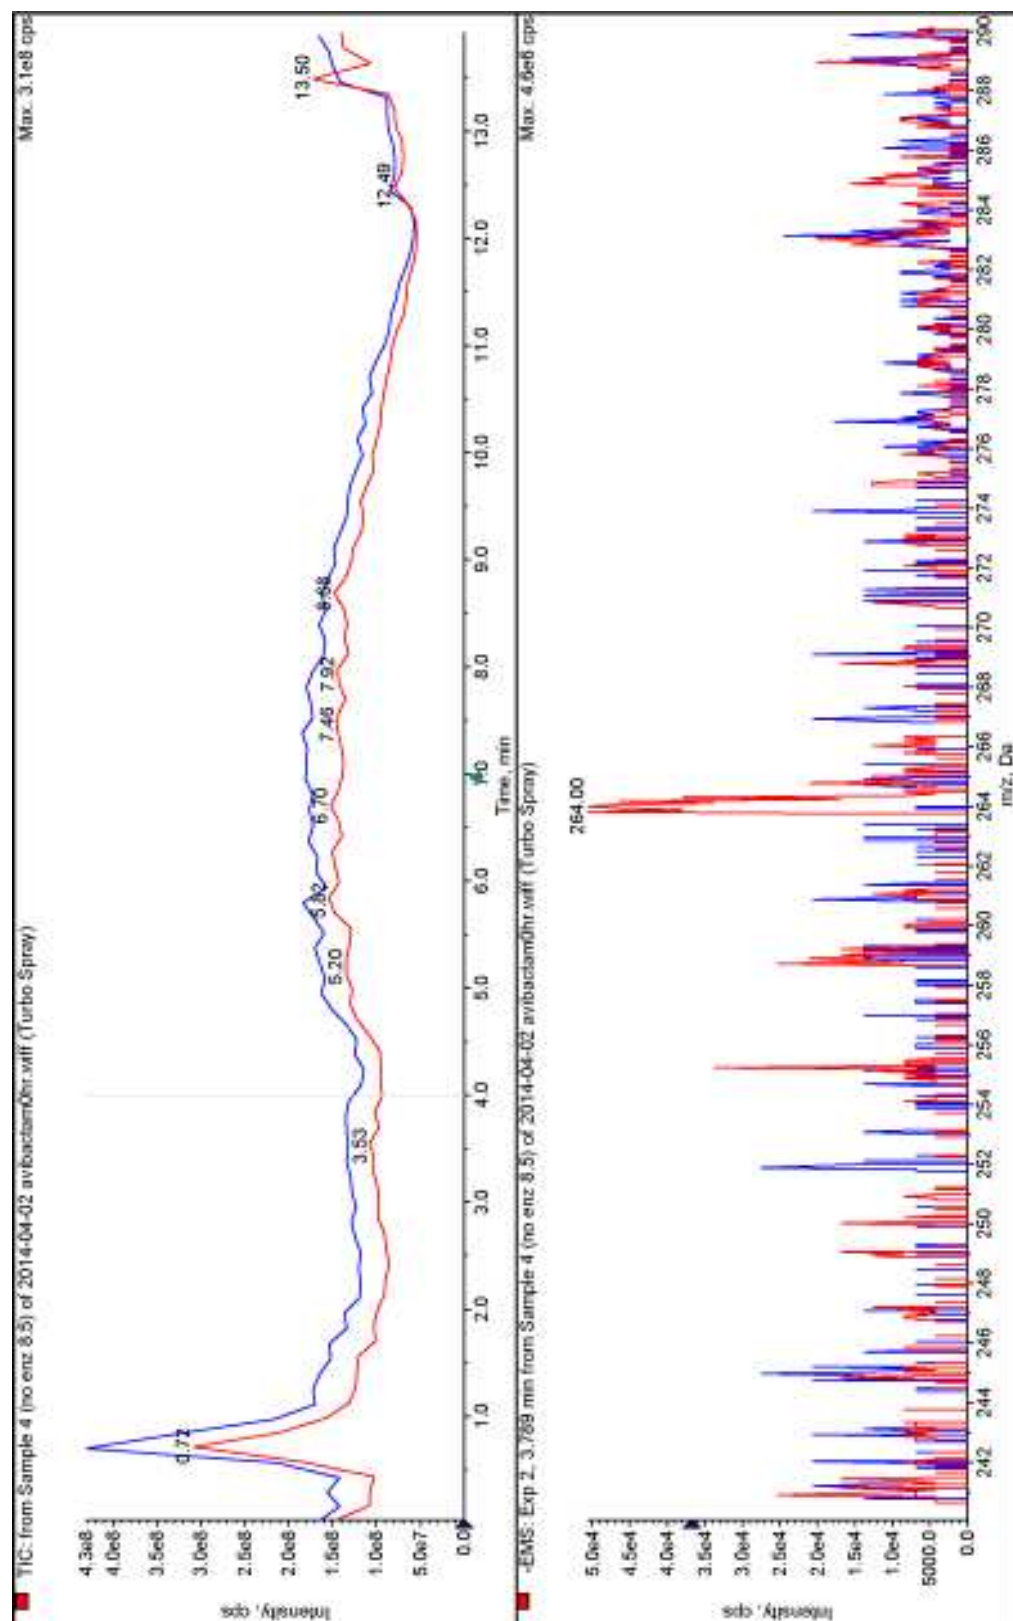

## REFERENCES

1. Paetzel, M.; Danel, F.; de Castro, L.; Mosimann, S. C.; Page, M. G.; Strynadka, N. C., Crystal structure of the class D beta-lactamase OXA-10. *Nat Struct Biol* **2000**, *7* (10), 918-25.
2. Lahiri, S. D.; Mangani, S.; Durand-Reville, T.; Benvenuti, M.; De Luca, F.; Sanyal, G.; Docquier, J. D., Structural insight into potent broad-spectrum inhibition with reversible recyclization mechanism: avibactam in complex with CTX-M-15 and *Pseudomonas aeruginosa* AmpC  $\beta$ -lactamases. *Antimicrob Agents Chemother* **2013**, *57* (6), 2496-505.
3. Laskowski, R. A.; Swindells, M. B., LigPlot+: multiple ligand-protein interaction diagrams for drug discovery. *J Chem Inf Model* **2011**, *51* (10), 2778-86.
